# Supplementary material
Source: publisher figshare collection journal article supplement (https://gsajournals.figshare.com/ndownloader/files/25512551)
Supplement: Supplementary file 1 [file 25512551]

## Sheet: Sheet1
Probe #	Probe sequence (5'-> 3')
1	CGGTGAACAGCTCCTCGC
2	CACCAGGATGGGCACCAC
3	GTTCACGTCGCCATCCAG
4	CGCACGCTGAACTTGTGG
5	GTCAGCTTGCCGTTGGTG
6	CCGGTGGTGCAGATGAAC
7	GTAGGTCAGGGTGGTCAC
8	GTAGCGGCTGAAGCACTG
9	TCGTGCTGCTTCATGTGA
10	GCATGGCGCTCTTGAAGA
11	TGAAGCTGATGGTGCGCT
12	CTTGTAGGTGCCGTCATC
13	TCGAACTTCACCTCGGCG
14	CGGTTCACCAGGGTATCG
15	AAATCGATGCCCTTCAGC
16	CAGGATGTTGCCATCCTC
17	TTGTACTCCAGCTTGTGG
18	GTACACGTTGTGGCTGTT
19	TTCTGCTTATCGGCGGTG
20	GAAGTTGGCCTTGATGCC
21	TCCACATTGTGGCGGATC
22	TAGTGATCGGCCAGCTGC
23	CGATGGGGGTGTTCTGCT
24	TATCGGGCAGCAGCACTG
25	CTGGGTGCTCAGGTAGTG
26	GTTGGGGTCCTTGGACAG
27	ACCATGTGATCGCGCTTC
28	CGGTCACGAACTCCAGCA
29	TCCATGCCCAGGGTGATG
30	CCTCGAGCTTGTACAGCT
